# Supplementary figures and images for: MV130 in the Prevention of Recurrent Respiratory Tract Infections: A Retrospective Real-World Study in Children and Adults
Source: MDPI journal article supplement (doi:10.3390/vaccines12020172), 2024-02-07

## Supplementary Figure S1

# A

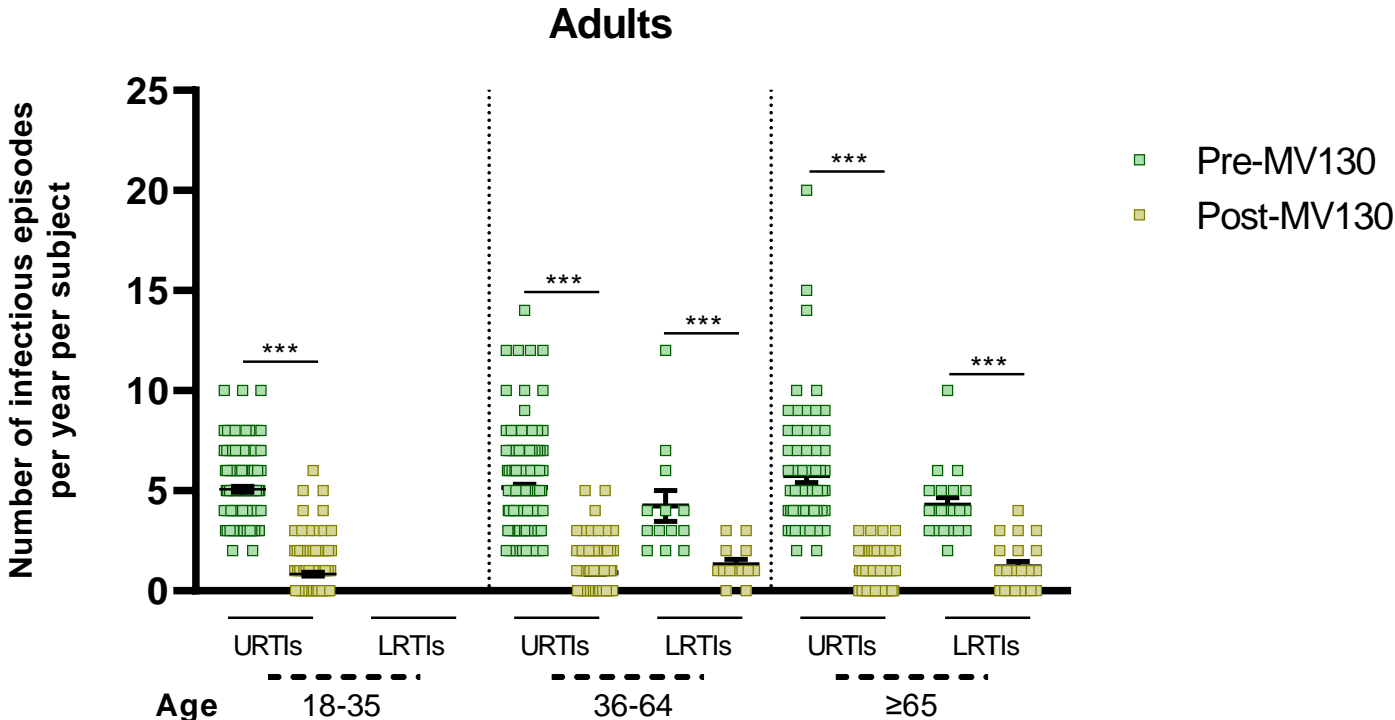

# B

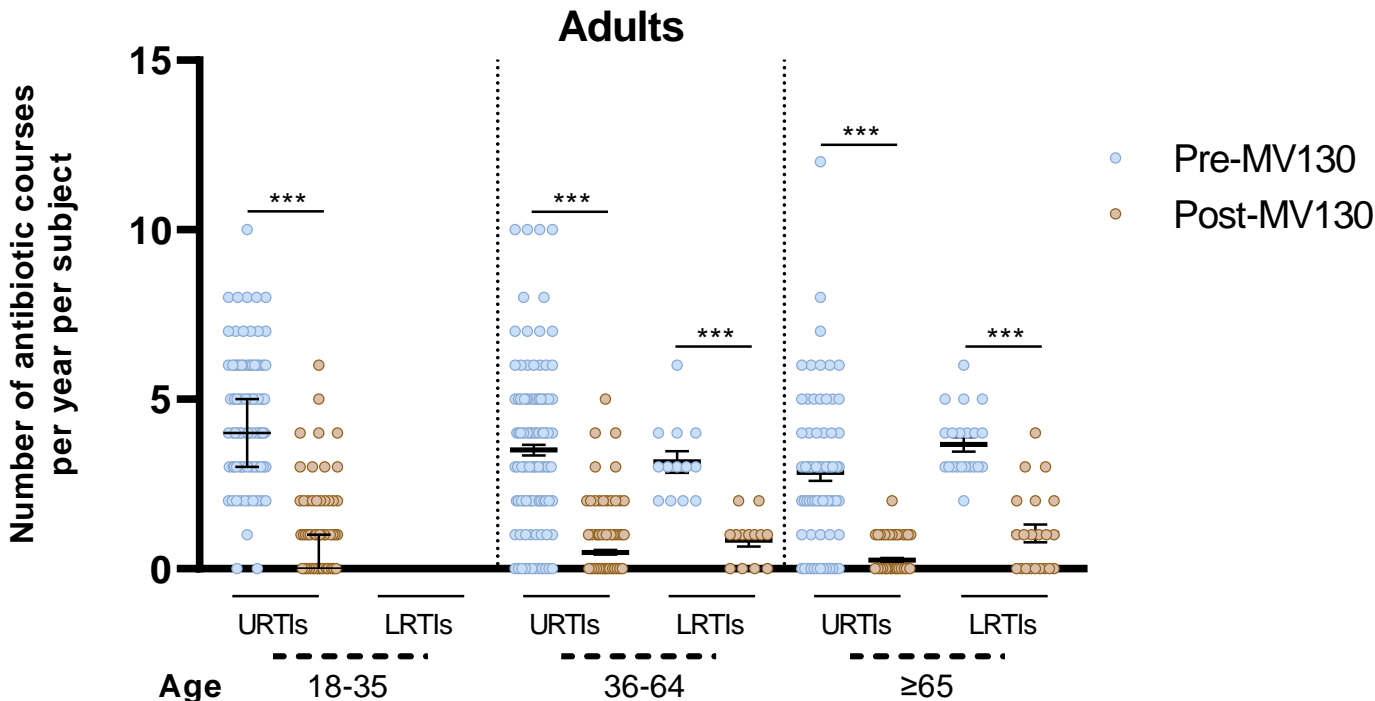

# Supplementary Figure S2

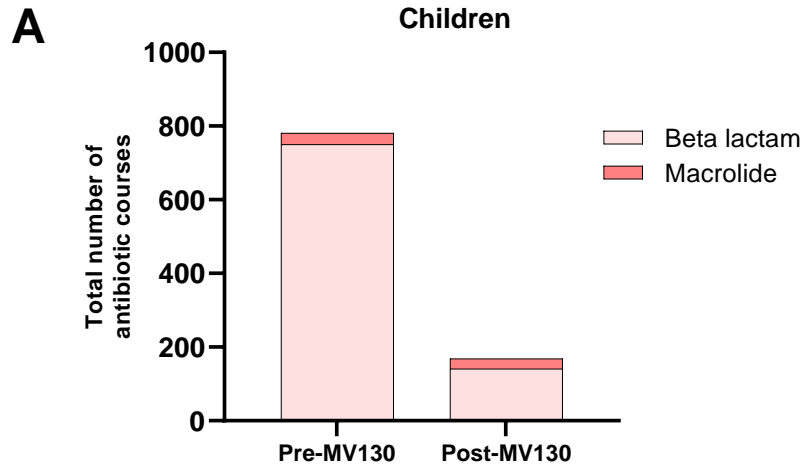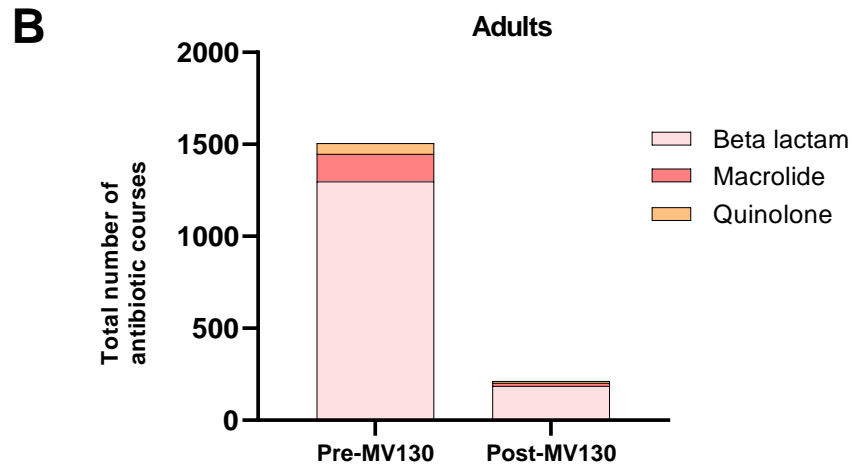

Supplement: s1 [file s1]
